# Supplementary material
Source: publisher site journal article supplement (https://www.spandidos-publications.com/5354/downloadSupplementary)

Figure S1. A leave-one-out sensitivity of progression-free survival in immunotherapy-based regimens compared with chemotherapy in EC/GC/GEJC. IPI, ipilimumab; NIVO, nivolumab; CT, chemotherapy; SE, standard error; df, degrees of freedom; CI, confidence interval.

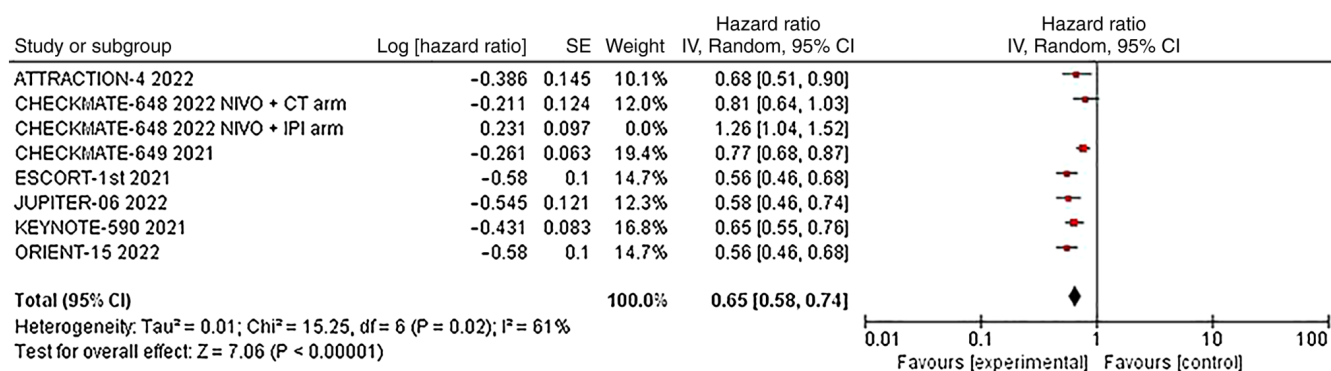

Figure S2. A leave-one-out sensitivity of disease control rate in immunotherapy-based regimens compared with chemotherapy in EC/GC/GEJC. IPI, ipilimumab; NIVO, nivolumab; CT, chemotherapy; SE, standard error; df, degrees of freedom; CI, confidence interval; M-H, Mantel-Haenszel.

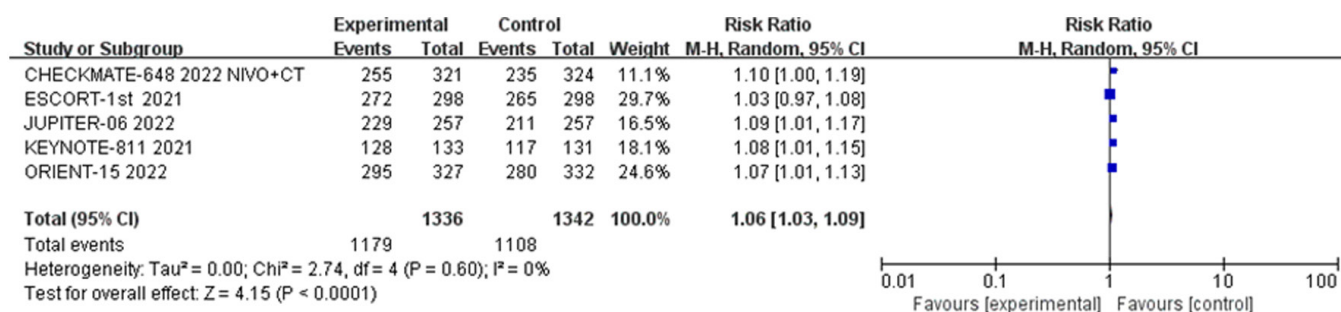

Figure S3. Subgroup analysis of OS in patients with PD-L1 CPS  $\geq 10$  and CPS  $< 10$  groups. CI, confidence interval; CPS, combined positive score; SE standard error; df, degrees of freedom; CI, confidence interval; M-H, Mantel-Haenszel.

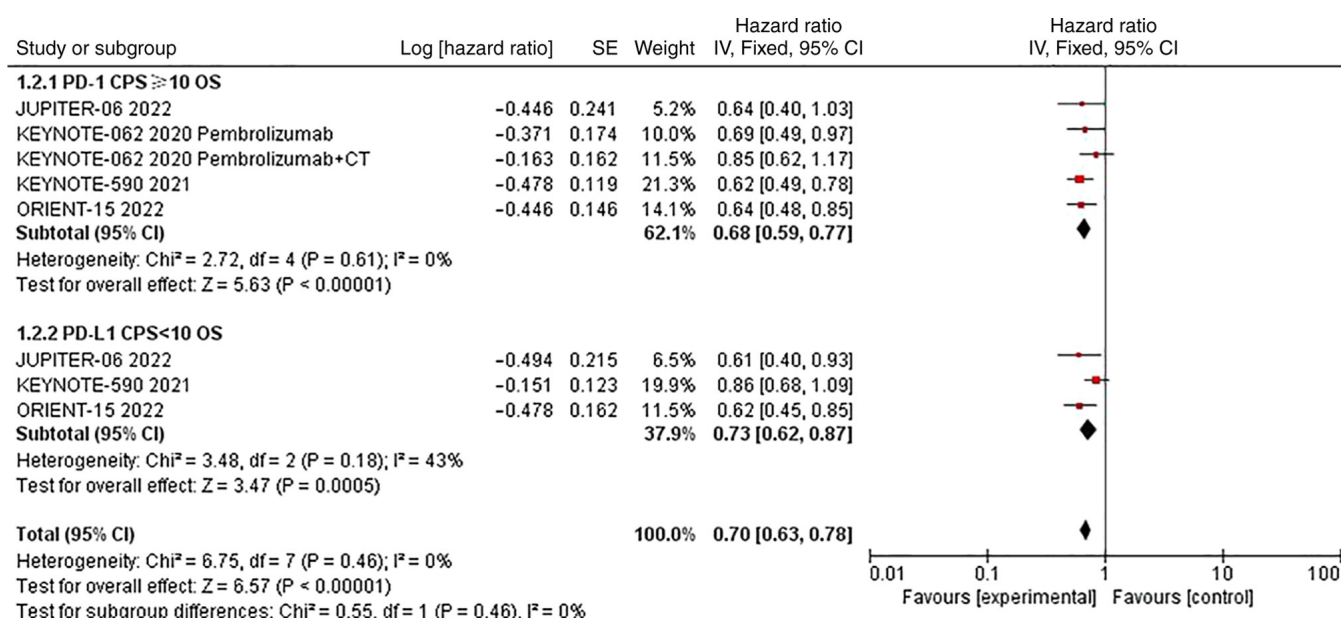

Figure S4. A leave-one-out sensitivity analysis of progression-free survival in patients with PD-L1 CPS  $\geq 10$ . IPI, ipilimumab; NIVO, nivolumab; CT, chemotherapy; SE, standard error; df, degrees of freedom; CI, confidence interval; CPS, combined positive score.

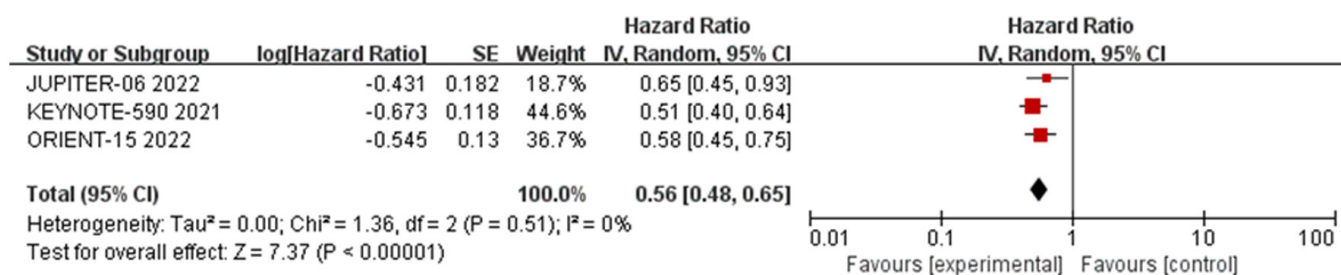

Figure S5. A leave-one-out sensitivity analysis of progression-free survival in patients with PD-L1 CPS <10. EC, oesophageal cancer; IPI, ipilimumab; NIVO, nivolumab; CT, chemotherapy; SE, standard error; df, degrees of freedom; CI, confidence interval; CPS, combined positive score.

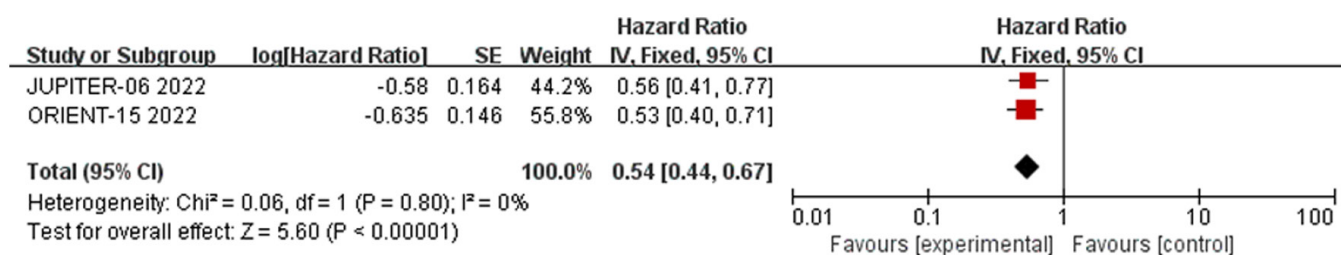

Figure S6. Subgroup analysis of progression-free survival in patients with PD-L1 CPS  $\geq 10$  and CPS  $< 10$  groups. CI, confidence interval; CPS, combined positive score; SE standard error.

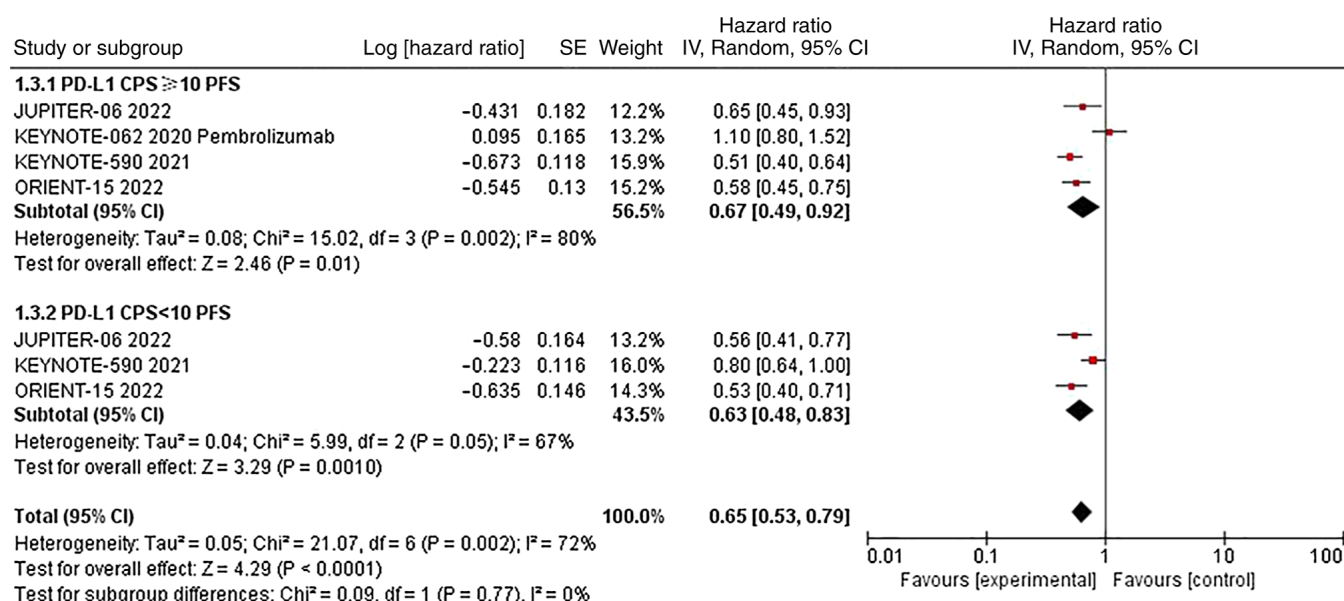

Figure S7. Subgroup analysis of overall survival in Asian and non-Asian patients. IPI, ipilimumab; NIVO, nivolumab; CT, chemotherapy; SE, standard error; df, degrees of freedom; CI, confidence interval.

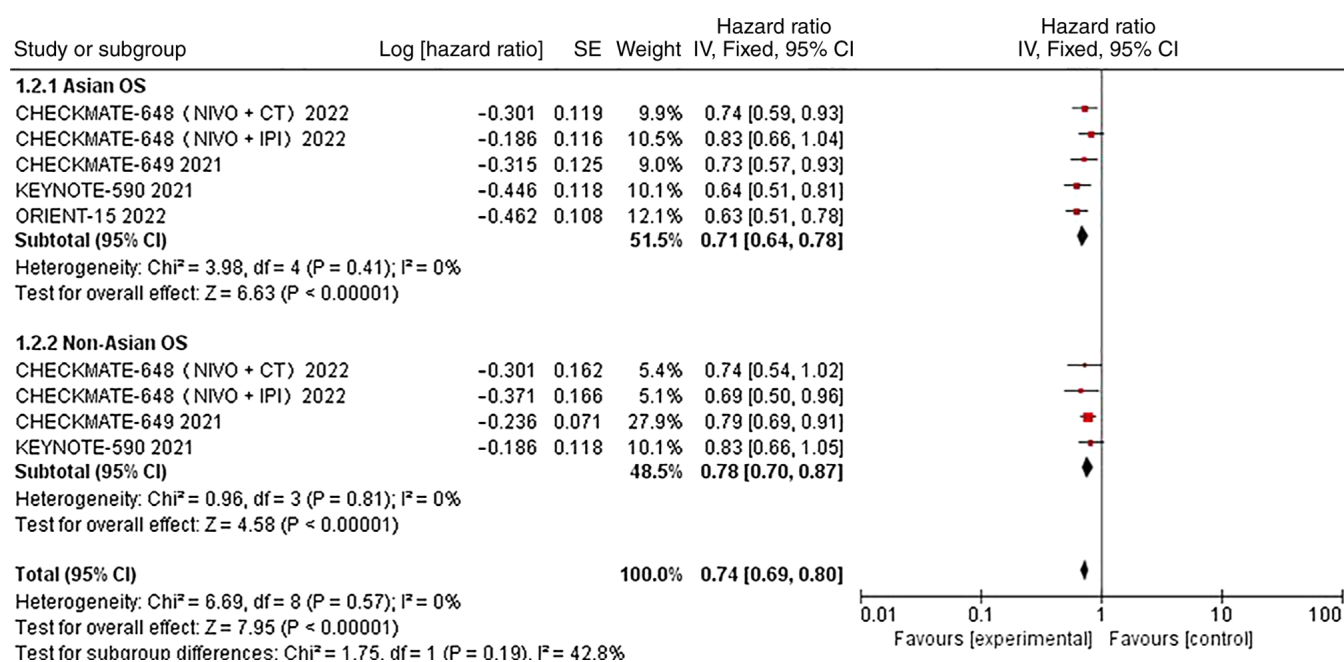

Figure S8. A leave-one-out sensitivity of the incidence of grade 3 and above adverse events in the two groups. IPI, ipilimumab; NIVO, nivolumab; CT, chemotherapy; SE, standard error; df, degrees of freedom; CI, confidence interval; M-H, Mantel-Haenszel.

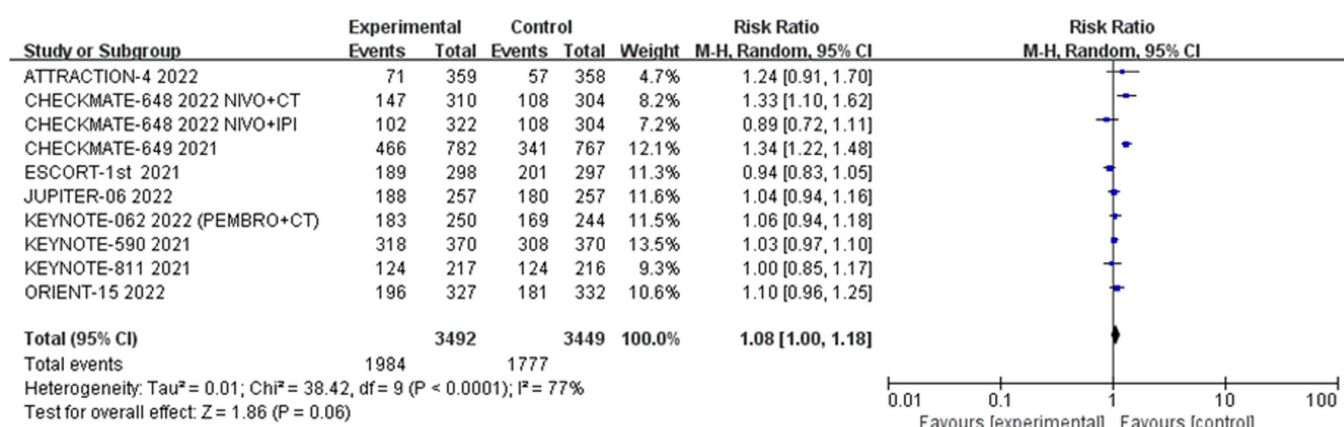

Supplement: Supplementary file 1 [file downloadSupplementary]
